# Supplementary material for: Kiwi 4.0: In Vivo Real-Time Monitoring to Improve Water Use Efficiency in Yellow Flesh Actinidia chinensis
Source: MDPI journal article supplement (doi:10.3390/bios14050226), 2024-05-03
Supplement: s1 [file s1]

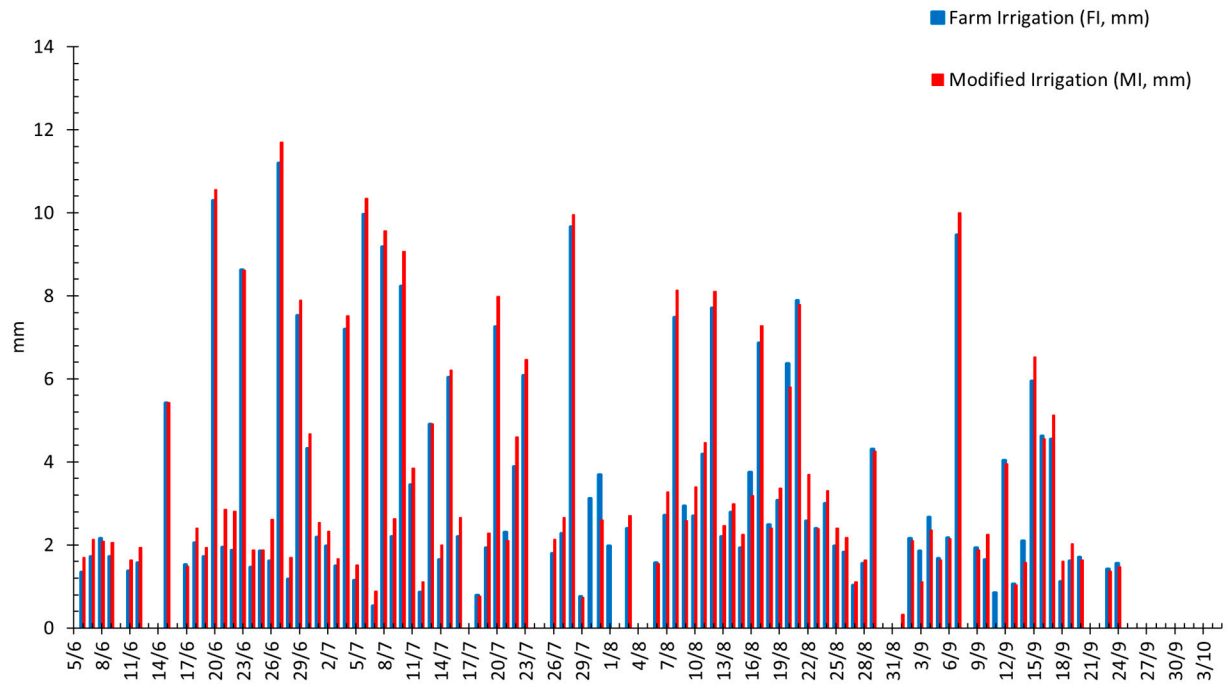

Figure S1. plot of the irrigations . Cesena, 2019.

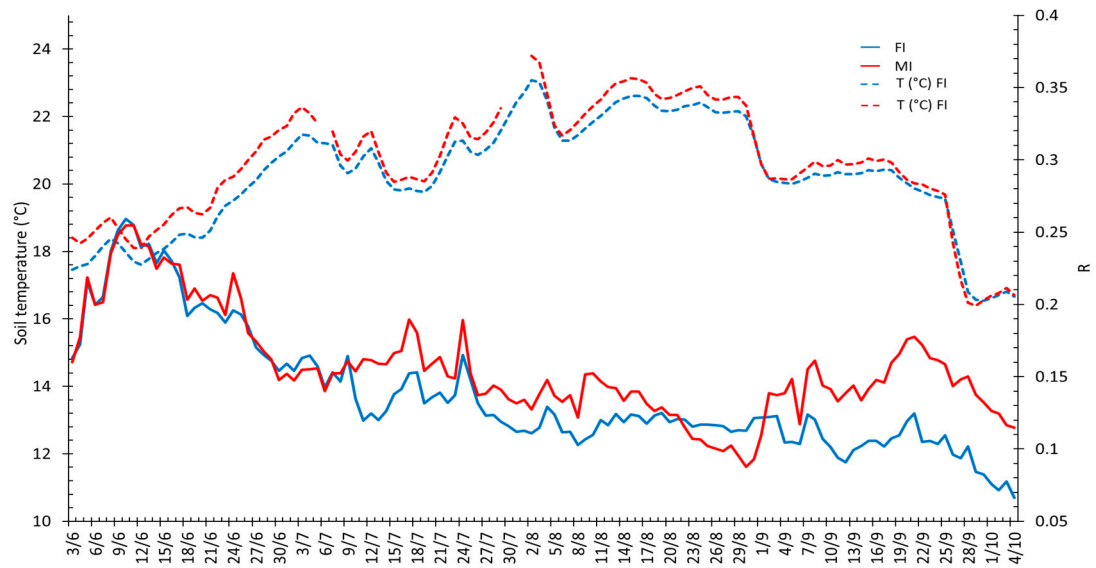

Figure S2. Plot of the sensor response and soil temperature monitoring. Cesena, 2019.

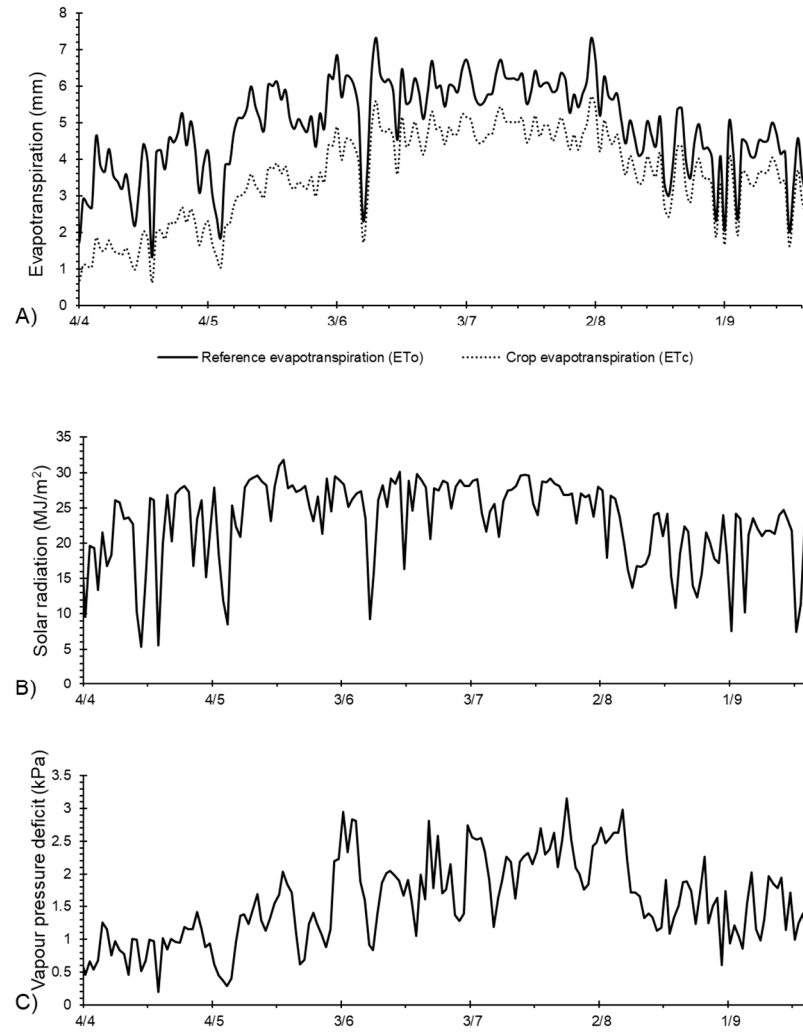

**Figure S3.** Plots of environmental variables recorded in 2022. A) crop evapotranspiration (mm), B) solar radiation (MJ/m<sup>2</sup>), C) vapor pressure deficit (VPD, (kPa), as recorded in the experimental trial in Scanzano Jonico 2022 .
